# Supplementary material
Source: Springer Nature journal article supplement (https://www.springermedizin.de/resource/supplementary/13058_2005_1327_MOESM3_ESM.pdf/9698862)

**Figure 3.**

(a)

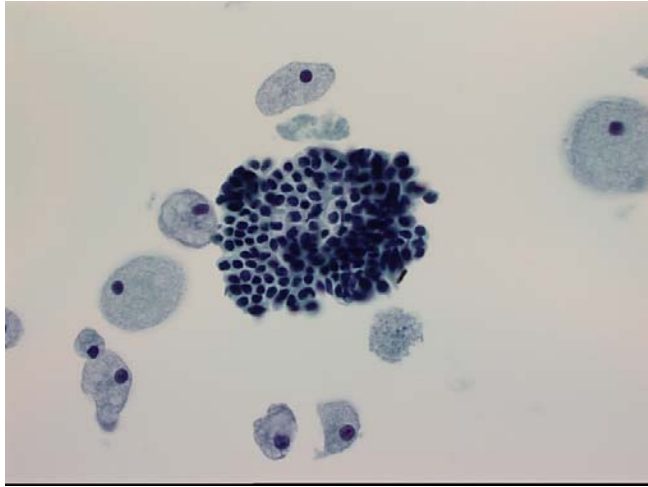

(b)

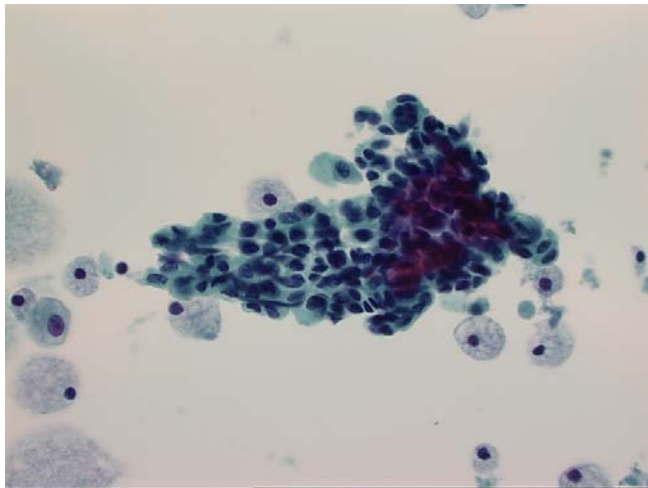

(c)

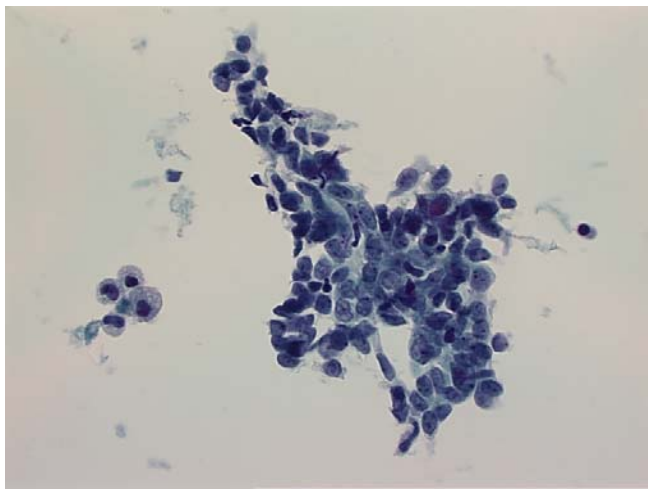

Supplement: MOESM3 [file 9698862]
